# Supplementary material for: Acyl-CoA:Diacylglycerol Acyltransferase 1 Expression Level in the Hematopoietic Compartment Impacts Inflammation in the Vascular Plaques of Atherosclerotic Mice
Source: PubMed Central journal article supplement (PMC4880185; doi:10.1371/journal.pone.0156364), 2016-05-25
Supplement: pone.0156364.s001.pdf [file pone.0156364.s001.pdf]

## SUPPLEMENTAL MATERIAL

### Supplemental Figure and Figure Legend

#### Supplemental Figure S1

A

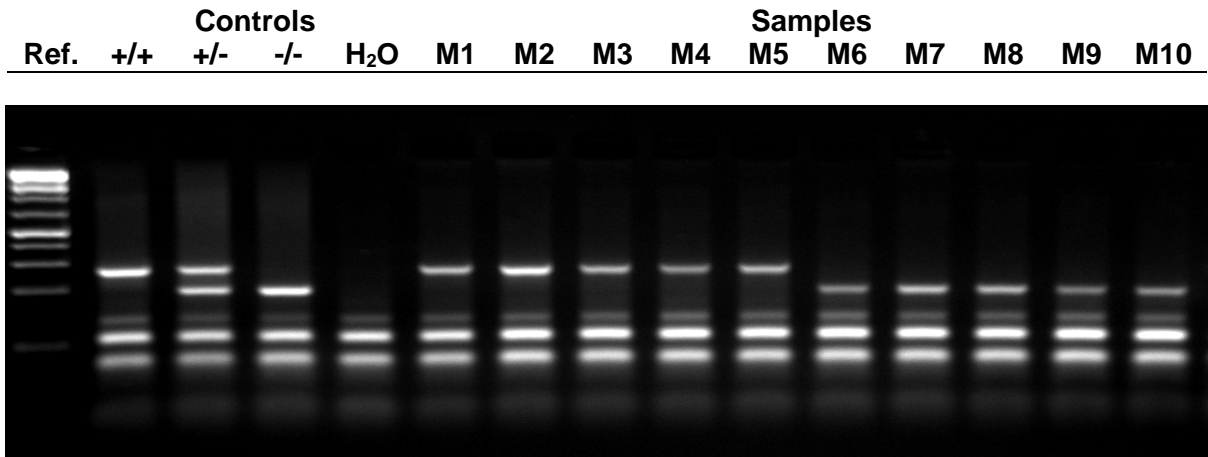

B

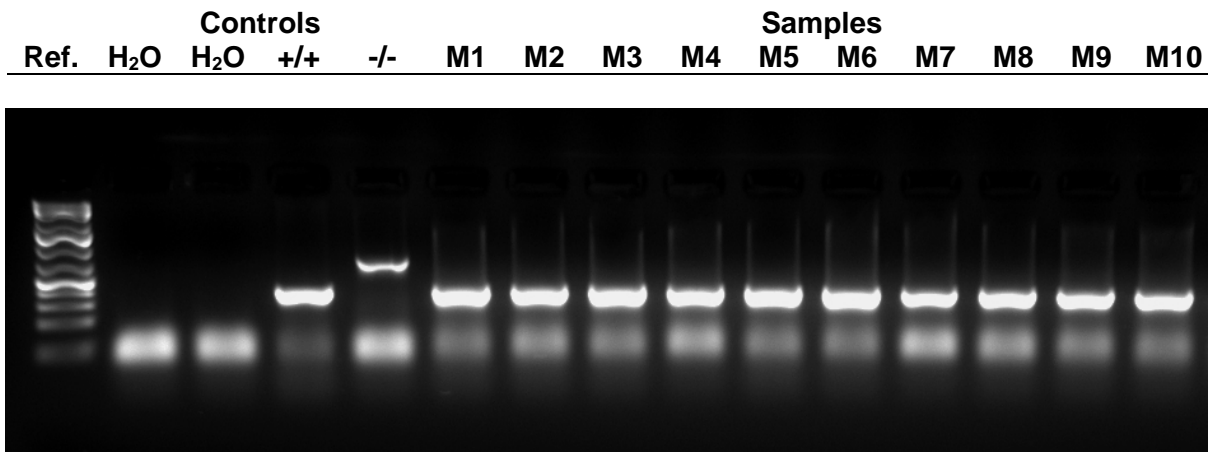

**Fig S1. Successful bone marrow transplantation from *WT* and *Dgat1*<sup>-/-</sup> donors to *Ldlr*<sup>-/-</sup> recipient mice.** Four weeks post-transplantation, peripheral blood samples were used for (A) *Dgat1* and (B) *Ldlr* genotyping. PCR products were analyzed by agarose gel electrophoresis. Images show representative gels for mice transplanted with *WT* or *Dgat1*<sup>-/-</sup> bone marrow, respectively.
